# Supplementary material
Source: PubMed Central journal article supplement (PMC5497594)
Supplement: NIHMS862095-supplement-supplement_1.pdf [file NIHMS862095-supplement-supplement_1.pdf]

Supplementary Table. Adjusted Odds of Medication Use or Behavioral Therapy in Patients with Peripheral Artery Disease Seeing Physicians in U.S. Ambulatory Care Visits, 2006-2013

| Characteristics                  | Antiplatelet     |         | Cilostazol       |         | Statin           |         | ACE inhibitor/ARB |         |
|----------------------------------|------------------|---------|------------------|---------|------------------|---------|-------------------|---------|
|                                  | Adj. OR (95% CI) | P value | Adj. OR (95% CI) | P value | Adj. OR (95% CI) | P value | Adj. OR (95% CI)  | P value |
| Sex                              |                  |         |                  |         |                  |         |                   |         |
| Men                              | 1.0              |         | 1.0              |         | 1.0              |         | 1.0               |         |
| Female                           | 1.0 (0.7- 1.4)   | 0.89    | 0.6 (0.3- 1.2)   | 0.17    | 0.8 (0.5- 1.1)   | 0.12    | 0.7 (0.5- 1.0)    | 0.06    |
| Race/ethnicity                   |                  |         |                  |         |                  |         |                   |         |
| White                            | 1.0              |         | 1.0              |         | 1.0              |         | 1.0               |         |
| Non-White                        | 1.5 (0.9- 2.5)   | 0.13    | 1.9 (0.5- 6.4)   | 0.33    | 1.0 (0.6- 1.8)   | 0.98    | 1.4 (0.8- 2.4)    | 0.27    |
| Age                              |                  |         |                  |         |                  |         |                   |         |
| <65                              | 1.0              |         | 1.0              |         | 1.0              |         | 1.0               |         |
| ≥65                              | 1.3 (0.8- 1.9)   | 0.26    | 0.6 (0.2- 1.4)   | 0.24    | 1.7 (1.0- 2.7)   | 0.04    | 1.0 (0.7- 1.5)    | 0.99    |
| Insurance                        |                  |         |                  |         |                  |         |                   |         |
| Private                          |                  |         |                  |         |                  |         |                   |         |
| Non-private insurance            | 1.2 (0.8- 1.8)   | 0.47    | 1.4 (0.6- 3.4)   | 0.41    | 0.8 (0.5- 1.2)   | 0.27    | 1.1 (0.7- 1.8)    | 0.75    |
| Urban or rural setting           |                  |         |                  |         |                  |         |                   |         |
| Urban                            | 1.0              |         | 1.0              |         | 1.0              |         | 1.0               |         |
| Rural                            | 0.9 (0.6- 1.5)   | 0.70    | 2.0 (0.8- 5.1)   | 0.15    | 0.5 (0.3- 1.0)   | 0.04    | 0.5 (0.3- 1.0)    | 0.04    |
| Risk Factor History              |                  |         |                  |         |                  |         |                   |         |
| Obesity                          | 0.8 (0.4- 1.3)   | 0.33    |                  |         | 0.8 (0.4- 1.3)   | 0.34    | 1.1 (0.6- 2.0)    | 0.73    |
| Smoker                           | 1.4 (0.9- 2.2)   | 0.16    |                  |         | 1.1 (0.7- 1.8)   | 0.65    | 1.0 (0.7- 1.5)    | 0.99    |
| COPD                             | 0.7 (0.4- 1.3)   | 0.32    |                  |         | 1.3 (0.8- 2.2)   | 0.33    | 1.1 (0.6- 1.8)    | 0.80    |
| Dyslipidemia                     | 1.3 (0.8- 2.0)   | 0.27    |                  |         | 3.3 (2.2- 5.1)   | <0.001  | 1.6 (1.1- 2.4)    | 0.03    |
| Diabetes                         | 0.9 (0.6- 1.4)   | 0.60    |                  |         | 1.2 (0.8- 2.0)   | 0.37    | 1.6 (1.1- 2.5)    | 0.02    |
| Hypertension                     | 1.2 (0.9- 1.7)   | 0.21    |                  |         | 1.2 (0.8- 1.8)   | 0.40    | 1.9 (1.2- 3.0)    | <0.01   |
| Chronic kidney disease           | 1.4 (0.7- 2.8)   | 0.31    |                  |         | 0.7 (0.4- 1.5)   | 0.41    | 0.7 (0.3- 1.7)    | 0.45    |
| Comorbid cardiovascular diseases |                  |         |                  |         |                  |         |                   |         |
| Coronary artery disease          | 2.3 (1.6- 3.4)   | <0.001  | 1.0 (0.5- 2.1)   | 0.91    | 1.6 (1.0- 2.4)   | 0.04    | 1.2 (0.9- 1.8)    | 0.27    |
| Stroke                           | 1.0 (0.6- 1.7)   | 0.93    | 1.0 (1.0- 1.0)   | .       | 1.4 (0.8- 2.4)   | 0.20    | 1.2 (0.7- 2.1)    | 0.45    |
| Time trend                       | 1.0 (0.9- 1.1)   | 0.62    | 1.0 (0.9- 1.2)   | 0.91    | 1.0 (0.9- 1.1)   | 0.57    | 0.9 (0.9- 1.0)    | 0.16    |

| Characteristics                  | Exercise or Diet Counseling |         | Smoking Cessation Advice or Medications* |         |  |
|----------------------------------|-----------------------------|---------|------------------------------------------|---------|--|
|                                  | Adj. OR (95% CI)            | P value | Adj. OR (95% CI)                         | P value |  |
| Sex                              |                             |         |                                          |         |  |
| Men                              | 1.0                         |         | 1.0                                      |         |  |
| Female                           | 1.2 (0.7- 2.0)              | 0.49    | 1.1 (0.5- 2.1)                           | 0.88    |  |
| Race/ethnicity                   |                             |         |                                          |         |  |
| White                            | 1.0                         |         | 1.0                                      |         |  |
| Non-White                        | 1.3 (0.6- 2.7)              | 0.47    | 0.3 (0.1- 0.9)                           | 0.03    |  |
| Age                              |                             |         |                                          |         |  |
| <65                              | 1.0                         |         | 1.0                                      |         |  |
| ≥65                              | 0.7 (0.4- 1.2)              | 0.18    | 0.3 (0.1- 0.7)                           | <0.01   |  |
| Insurance                        |                             |         |                                          |         |  |
| Private                          |                             |         |                                          |         |  |
| Non-private insurance            | 0.8 (0.4- 1.7)              | 0.63    | 1.0 (0.5- 2.1)                           | 0.98    |  |
| Urban or rural setting           |                             |         |                                          |         |  |
| Urban                            | 1.0                         |         | 1.0                                      |         |  |
| Rural                            | 0.6 (0.3- 1.1)              | 0.10    | 0.8 (0.3- 2.6)                           | 0.77    |  |
| Risk Factor History              |                             |         |                                          |         |  |
| Obesity                          | 3.5 (2.1- 6.1)              | <0.001  | 0.8 (0.3- 2.2)                           | 0.64    |  |
| Smoker                           | 0.8 (0.5- 1.5)              | 0.55    |                                          |         |  |
| COPD                             | 0.5 (1.3- 0.8)              | 2.18    | 1.4 (0.6- 3.2)                           | 0.47    |  |
| Dyslipidemia                     | 1.8 (1.1- 3.0)              | 0.03    | 1.6 (0.8- 3.4)                           | 0.18    |  |
| Diabetes                         | 1.1 (0.7- 1.7)              | 0.84    | 1.0 (0.5- 1.9)                           | 0.88    |  |
| Hypertension                     | 1.6 (0.9- 2.7)              | 0.09    | 0.7 (0.3- 1.7)                           | 0.42    |  |
| Chronic kidney disease           | 1.2 (0.5- 2.8)              | 0.68    | 1.5 (0.4- 5.3)                           | 0.52    |  |
| Comorbid cardiovascular diseases |                             |         |                                          |         |  |
| Coronary artery disease          | 0.9 (0.5- 1.6)              | 0.71    | 3.5 (1.6- 7.4)                           | <0.01   |  |
| Stroke                           | 1.3 (0.7- 2.3)              | 0.38    | 0.6 (0.2- 2.1)                           | 0.42    |  |
| Time trend                       | 0.9 (0.8- 1.0)              | 0.10    | 1.0 (0.9- 1.2)                           | 0.69    |  |

Abbreviations: PAD, peripheral artery disease; COPD, chronic obstructive pulmonary disease; CAD, coronary artery disease

Notes: Trend analyses based on logistic regression models using 2005-2012 data, with adjustment for patient characteristics. Regression model for cilostazol includes a limited number of covariates due to sample size restrictions.

\*Medications for smoking cessation include nicotine replacement therapy, varenicline, and bupropion
